# Supplementary material for: Total Soil CO2 Efflux from Drained Terric Histosols
Source: MDPI journal article supplement (doi:10.3390/plants13010139), 2024-01-04
Supplement: s1 [file s1]

Table S1. Mean dendrometric properties of the studied forest stands.

| Tree species  | Age,<br>yr | H,<br>m | DBH,<br>cm | Tree density,<br>Trees ha <sup>-1</sup> | Stem<br>volume,<br>m <sup>3</sup> ha <sup>-1</sup> |
|---------------|------------|---------|------------|-----------------------------------------|----------------------------------------------------|
| Norway spruce | 70         | 19.3    | 20.2       | 860                                     | 259                                                |
| Silver birch  | 43         | 18.0    | 20.4       | 893                                     | 193                                                |
| Black alder   | 30         | 18.8    | 16.5       | 1600                                    | 238                                                |

Notes: DBH – diameter at breast height (1.3 m); H – height of tree.
